# Supplementary material for: Generation of PVP Membranes Using Extracts/Phenolic Fraction of Dysphania ambrosioides, Opuntia ficus-indica, and Tradescantia pallida
Source: MDPI journal article supplement (doi:10.3390/polym15244720), 2023-12-15
Supplement: s1 [file s1]

## Supplementary data

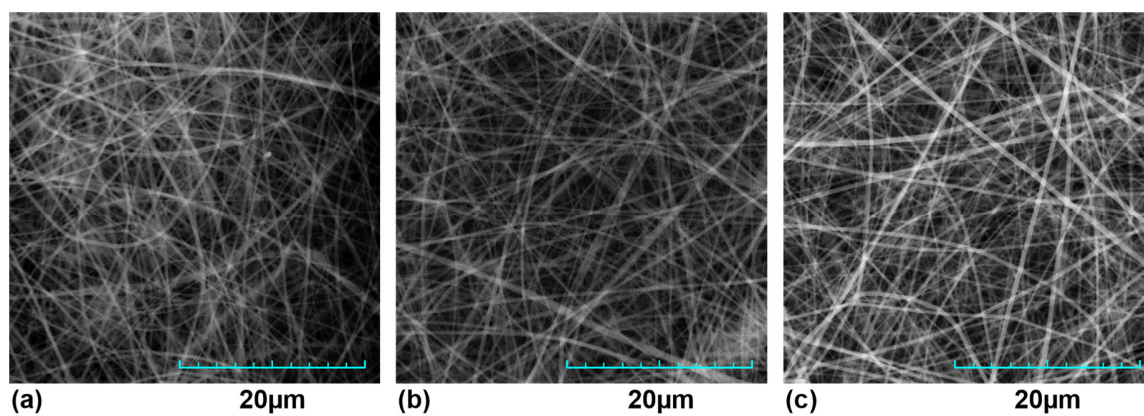

**Figure S1.** SEM micrograph of membranes. (a) FR-DA+PVP, (b) FR-OFI+PVP, and (c) FR-TP+PVP.

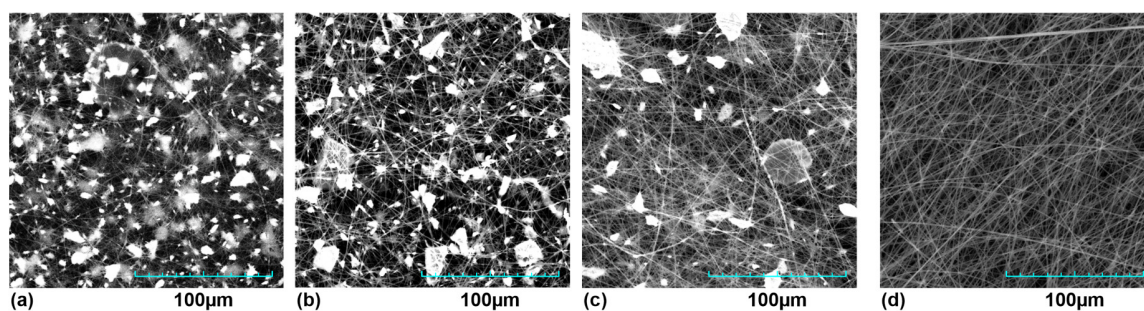

**Figure S2.** SEM micrograph of membranes. (a) DA+PVP, (b) OFI+PVP, (c) TP+PVP, and (d) PVP Control

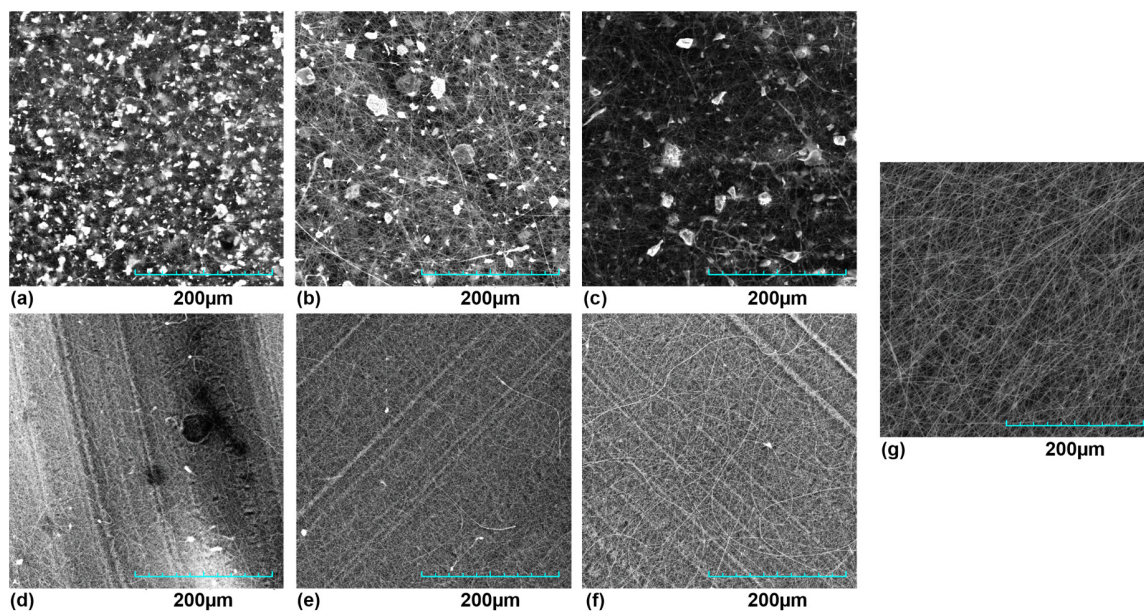

**Figure S3.** SEM micrograph of membranes. (a) DA+PVP, (b) OFI+PVP, (c) TP+PVP, (d) FR-DA+PVP, (e) FR-OFI+PVP, (f) FR-TP+PVP, and (g) PVP Control

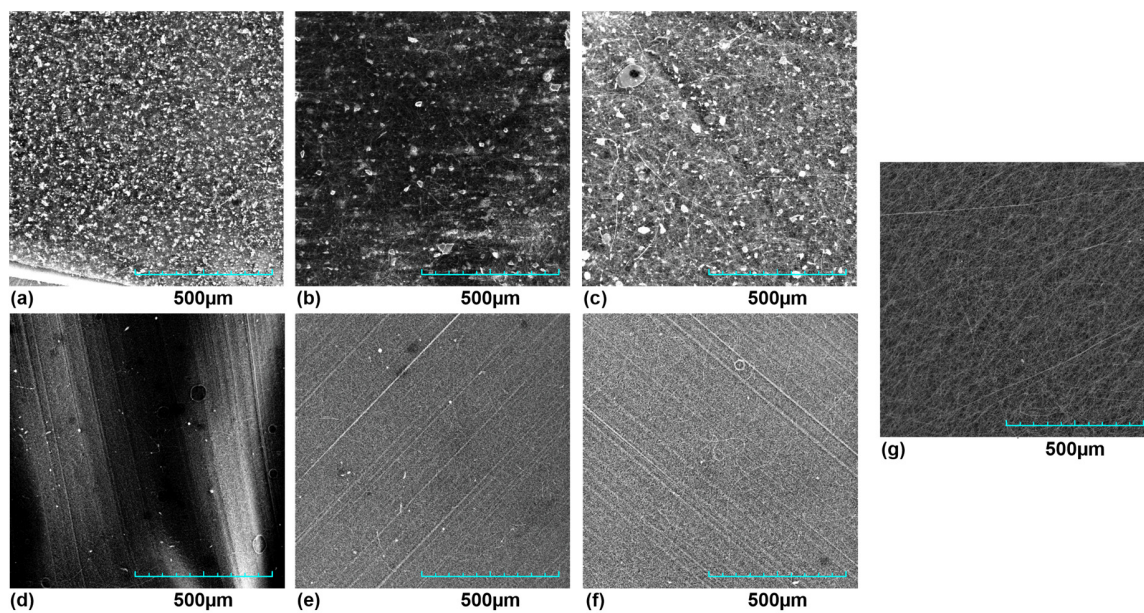

**Figure S4.** SEM micrograph of membranes. (a) DA+PVP, (b) OFI+PVP, (c) TP+PVP, (d) FR-DA+PVP, (e) FR-OFI+PVP, (f) FR-TP+PVP, and (g) PVP Control
